# Supplementary material for: Preparation, Characterization and In Vitro Biological Activities of New Diphenylsulphone Derived Schiff Base Ligands and Their Co(II) Complexes
Source: MDPI journal article supplement (doi:10.3390/molecules27238576), 2022-12-05
Supplement: s1 [file s1]

# Supporting Information

## Preparation, Characterization and *in vitro* Biological Activities of New Diphenylsulphone Derived Schiff Base Ligands and Their Co(II) Complexes

Kundalkesha D. Gaikwad <sup>1,2</sup>, Panchsheela Ubale <sup>3</sup>, Rahul Khobragade <sup>4</sup>, Sachin Deodware <sup>2</sup>, Pratibha Dhale <sup>2</sup>, Mahadev R. Asabe <sup>5</sup>, Rekha M. Ovhal <sup>5</sup>, Pranav Singh <sup>6</sup>, Prashant Vishwanath <sup>7</sup>, Chandan Shivamallu <sup>8</sup>, Raghu Ram Achar <sup>9</sup>, Ekaterina Silina <sup>10,11</sup>, Victor Stupin <sup>10</sup>, Natalia Manturova <sup>10</sup>, Ali A. Shati <sup>12</sup>, Mohammad Y. Alfaifi <sup>12</sup>, Serag Eldin I. Elbehairi <sup>12,13</sup>, Shashikant H. Gaikwad <sup>2,\*</sup> and Shiva Prasad Kollur <sup>14,\*</sup>

<sup>1</sup> Department of Chemistry, Sangameshawar College, Solapur 413 001, India

<sup>2</sup> Chemistry Research Laboratory, Department of Chemistry, Shri Shivaji Mahavidyalaya, Barshi, Solapur 413 411, India

<sup>3</sup> N.K. Orchid College of Engineering and Technology, Solapur 413 002, India

<sup>4</sup> Department of Microbiology, Dr. Babasaheb Ambedkar Marathwada University, Sub Campus, Osmanabad 413 501, India

<sup>5</sup> Department of Chemistry, Walchand College of Art and Science, Solapur 413 006, India

<sup>6</sup> Department of Medicine, Kasturba Medical College, Manipal Academy of Higher Education, Manipal, Udipi 576 104, India

<sup>7</sup> Centre for Excellence in Molecular Biology and Regenerative Medicine, Department of Biochemistry, JSS Medical College, JSS Academy of Higher Education and Research, Mysuru 570 015, India

<sup>8</sup> Department of Biotechnology and Bioinformatics, School of Life Sciences, JSS Academy of Higher Education and Research, Mysuru 570 015, India

<sup>9</sup> Division of Biochemistry, School of Life Sciences, JSS Academy of Higher Education and Research, Mysuru 570 015, India

<sup>10</sup> Department of Hospital Surgery, N.I. Pirogov Russian National Research Medical University, Moscow 117997, Russia

<sup>11</sup> Institute of Biodesign and Modeling of Complex Systems, I.M. Sechenov First Moscow State Medical University (Sechenov University), Moscow 119991, Russia

<sup>12</sup> Biology Department, Faculty of Science, King Khalid University, Abha 9004, Saudi Arabia

<sup>13</sup> Cell Culture Lab, Egyptian Organization for Biological Products and Vaccines (VACSERA Holding Company), 51 Wezaret El-Zeraa St., Giza 22311, Egypt

<sup>14</sup> School of Physical Sciences, Amrita Vishwa Vidyapeetham, Mysuru Campus, Mysuru 570 026, India

\* Correspondence: rasayanshg@gmail.com (S.H.G.); shivachemist@gmail.com (S.P.K.)

## Contents:

**Figure S1:** FT-IR spectrum of L<sub>1</sub>.

**Figure S2:** FT-IR spectrum of L<sub>2</sub>.

**Figure S3:** FT-IR spectrum of L<sub>4</sub>.

**Figure S4:** FT-IR spectrum of L<sub>5</sub>.

**Figure S5:** FT-IR spectrum of C<sub>1</sub>.

**Figure S6:** FT-IR spectrum of C<sub>2</sub>.

**Figure S7:** FT-I spectrum of C<sub>3</sub>.

**Figure S8:** FT-IR spectrum of C<sub>4</sub>.

**Figure S9:** FT-IR spectrum of C<sub>5</sub>.

**Figure S10:** <sup>1</sup>H-NMR spectrum of L<sub>1</sub>.

**Figure S11:** <sup>1</sup>H-NMR spectrum of L<sub>2</sub>.

**Figure S12:** <sup>1</sup>H-NMR spectrum of L<sub>4</sub>.

**Figure S13:** <sup>1</sup>H-NMR spectrum of L<sub>5</sub>.

**Figure S14:** Mass spectrum of L<sub>1</sub>.

**Figure S15:** Mass spectrum of L<sub>2</sub>.

**Figure S16:** Mass spectrum of L<sub>3</sub>.

**Figure S17:** Mass spectrum of L<sub>4</sub>.

**Figure S18:** Mass spectrum of L<sub>5</sub>.

**Figure S19:** Ni-and ligands Antibacterial activity against *Staphylococcus aureus*.

**Figure S20:** Ni-complex Antifungal activity against *Aspergillus niger*.

**Figure S21:** Ligand-Antifungal activity against *Aspergillus niger*.

**Figure S22:** Ni and Ligands Antibacterial activity against *Bacillus subtilis*.

**Figure S23:** Mass fragmentation pattern of L<sub>1</sub>.

**Figure S24:** UV-Visible absorption spectra of complexes.

**Figure S25:** <sup>1</sup>H-NMR spectrum of C<sub>1</sub>.

**Figure S26:** <sup>1</sup>H-NMR spectrum of C<sub>2</sub>.

**Figure S27:** <sup>1</sup>H-NMR spectrum of C<sub>3</sub>.

**Figure S28:** <sup>13</sup>C-NMR spectrum of C<sub>1</sub>.

**Figure S29:** <sup>13</sup>C-NMR spectrum of C<sub>2</sub>.

**Figure S30:** <sup>13</sup>C-NMR spectrum of C<sub>3</sub>.

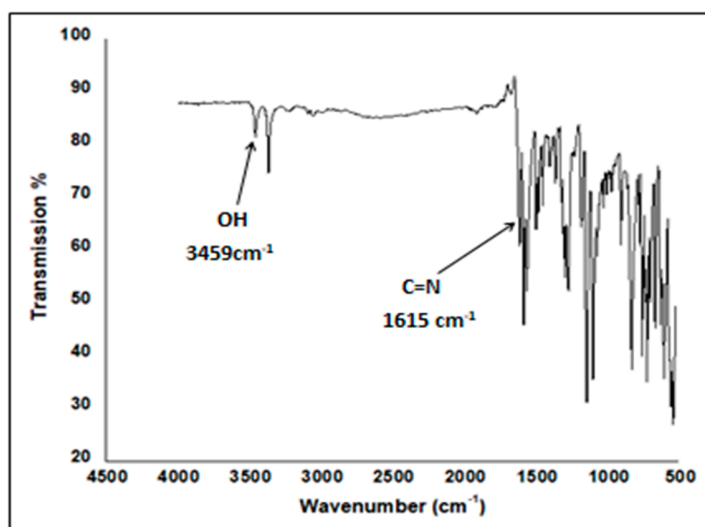

**Figure S1:** FT-IR spectrum of L<sub>1</sub>.

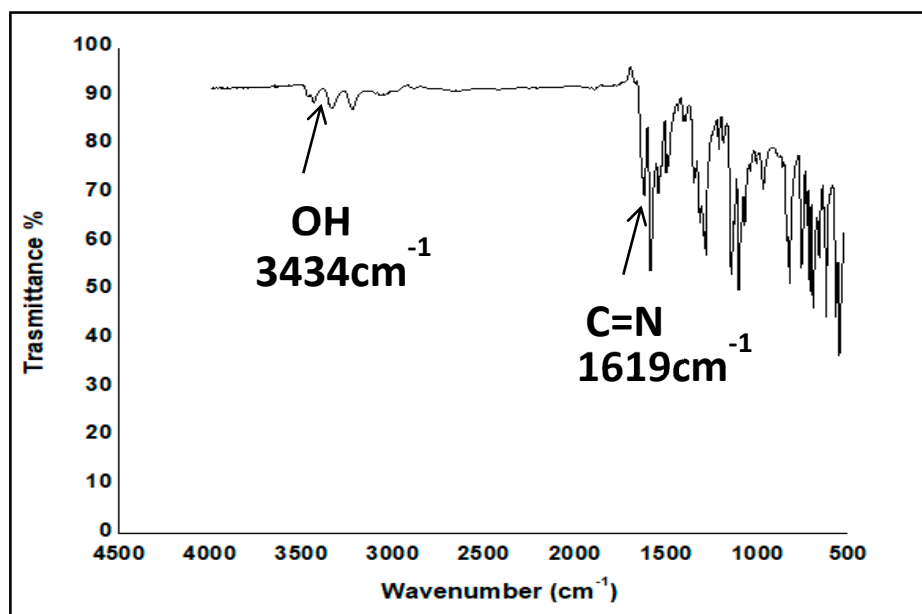

Figure S2: FT-IR spectrum of L<sub>2</sub>.

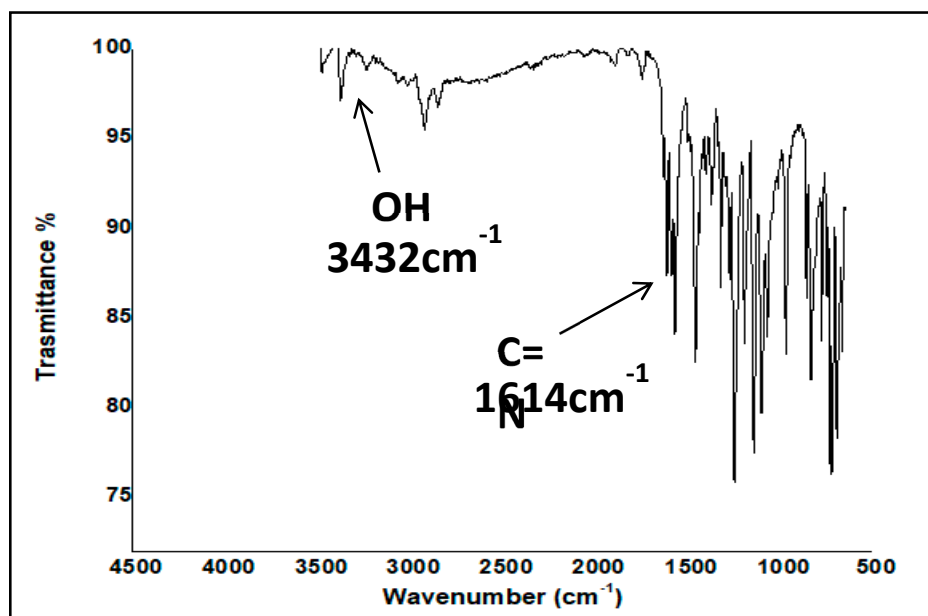

Figure S3: FT-IR spectrum of L<sub>4</sub>.

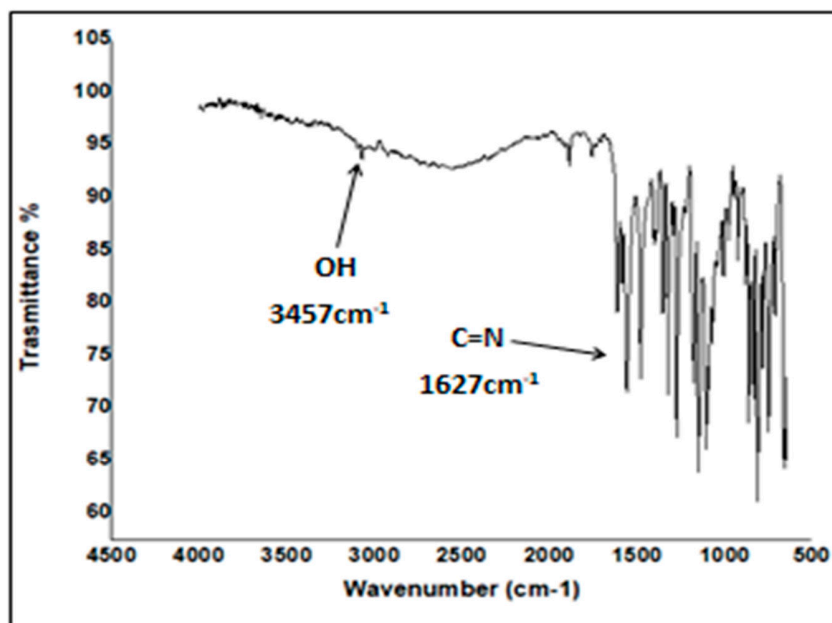

Figure S4: FT-IR spectrum of L<sub>5</sub>.

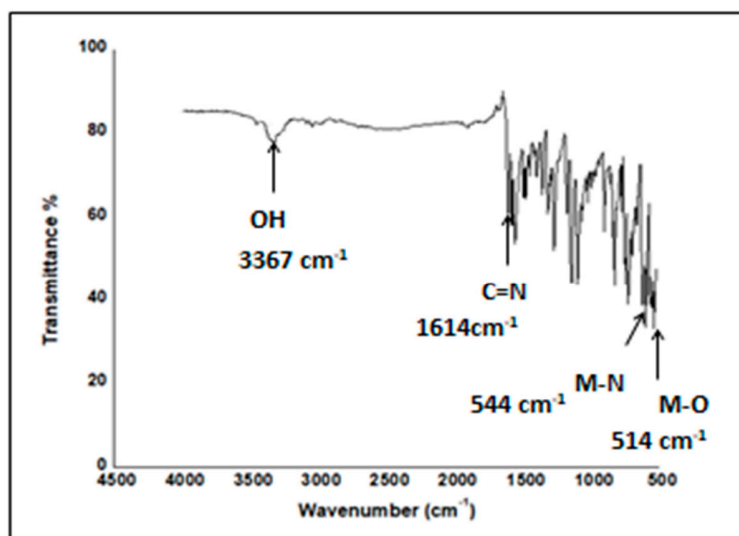

**Figure S5:** FT-IR spectrum of C<sub>1</sub>.

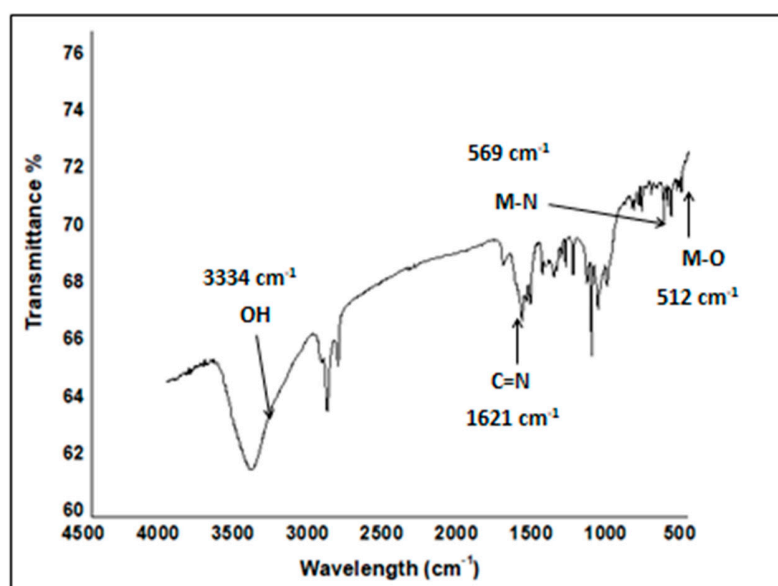

**Figure S6:** FT-IR spectrum of C<sub>2</sub>.



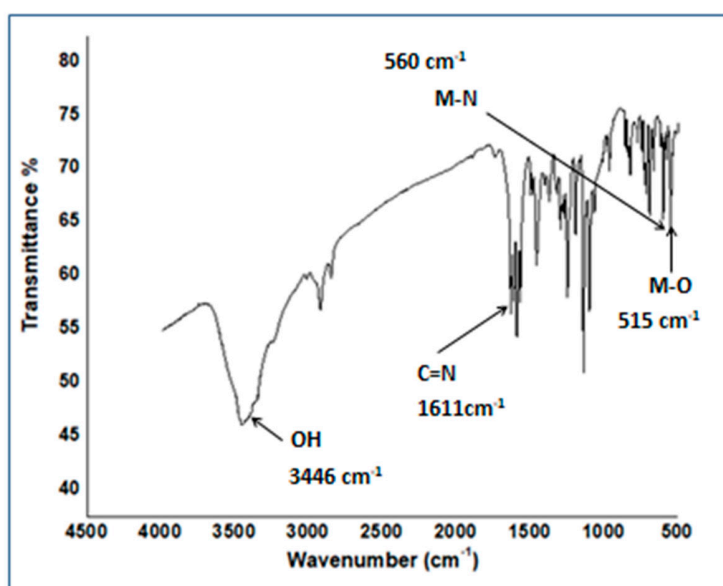

**Figure S7:** FT-IR spectrum of C<sub>3</sub>.

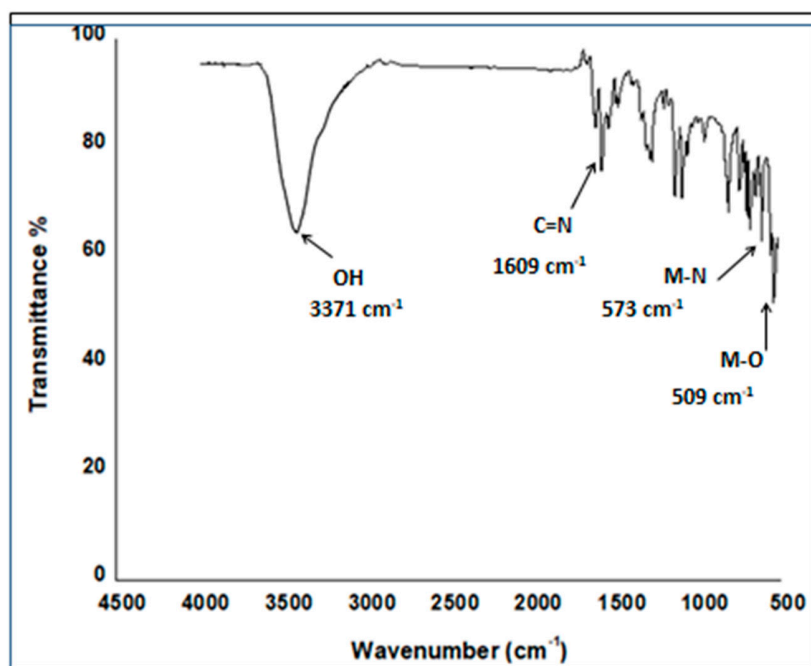

Figure S8: FT-IR spectrum of C<sub>4</sub>.

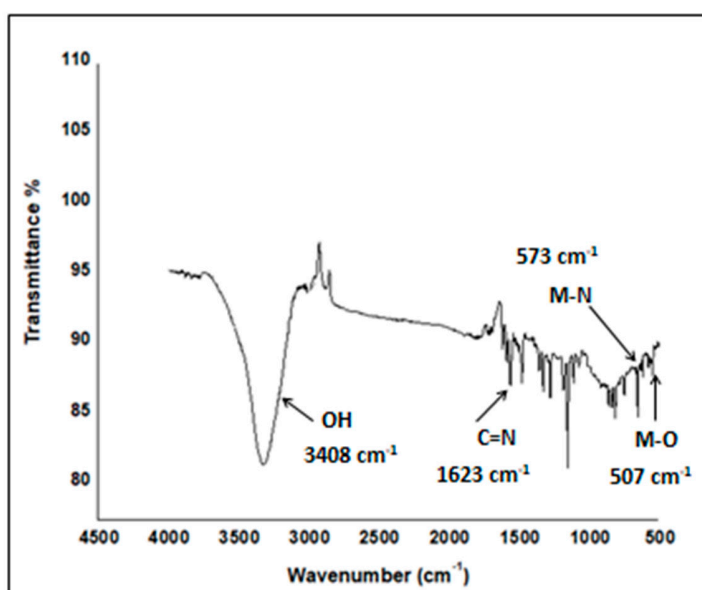

**Figure S9:** FT-IR spectrum of C<sub>5</sub>.

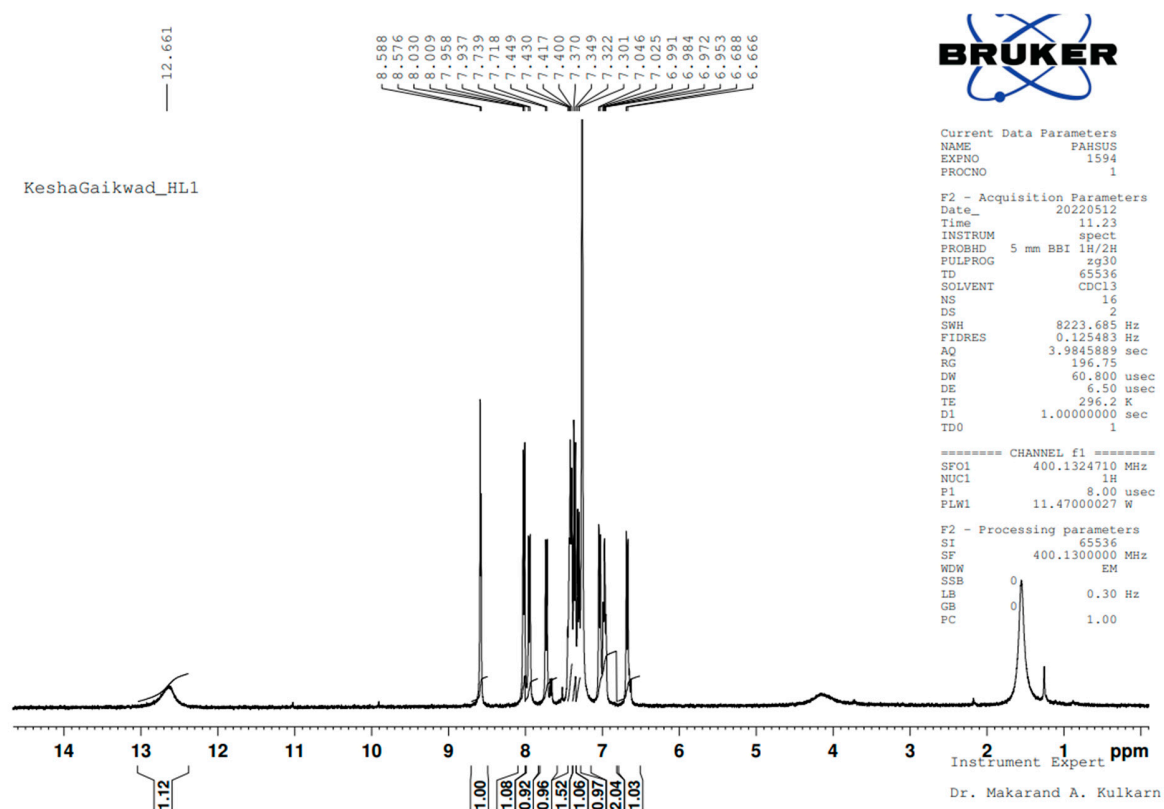

**Figure S10:**  $^1\text{H}$ -NMR spectrum of **L<sub>1</sub>**.

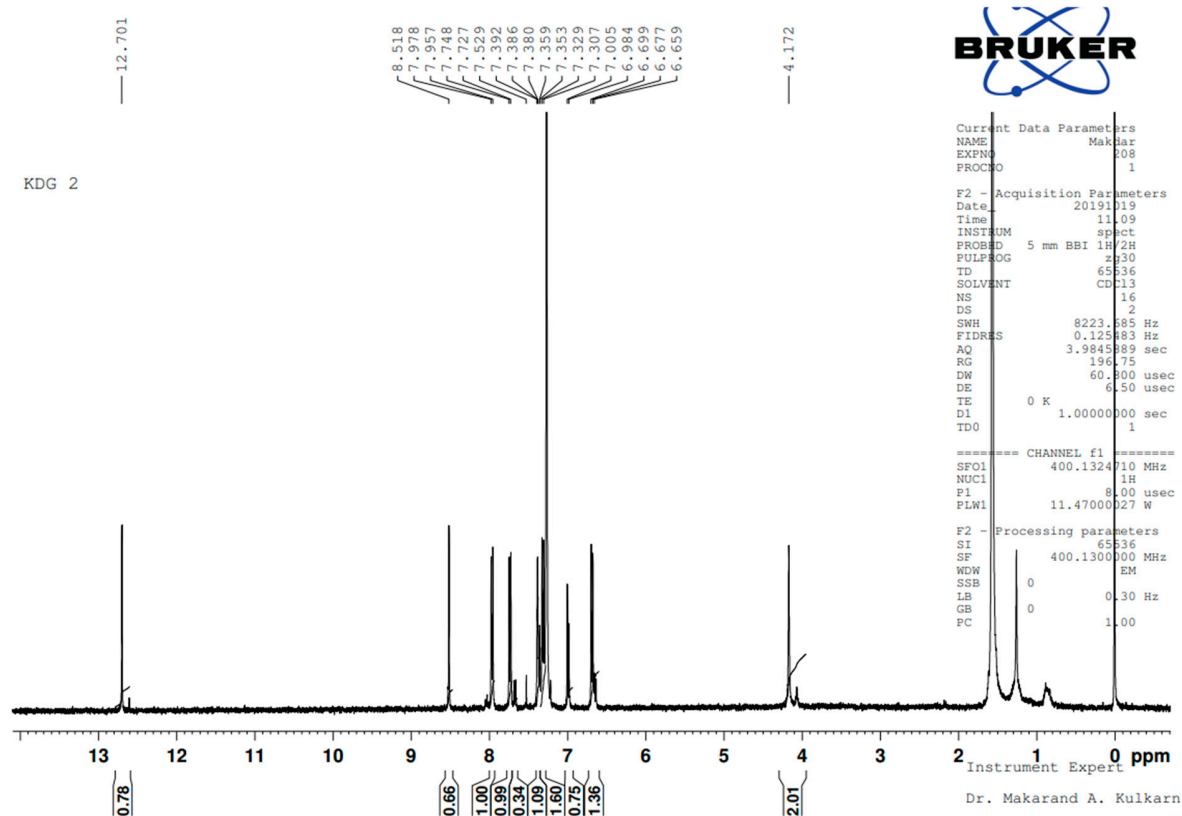

Figure S11:  $^1\text{H}$ -NMR spectrum of L3.

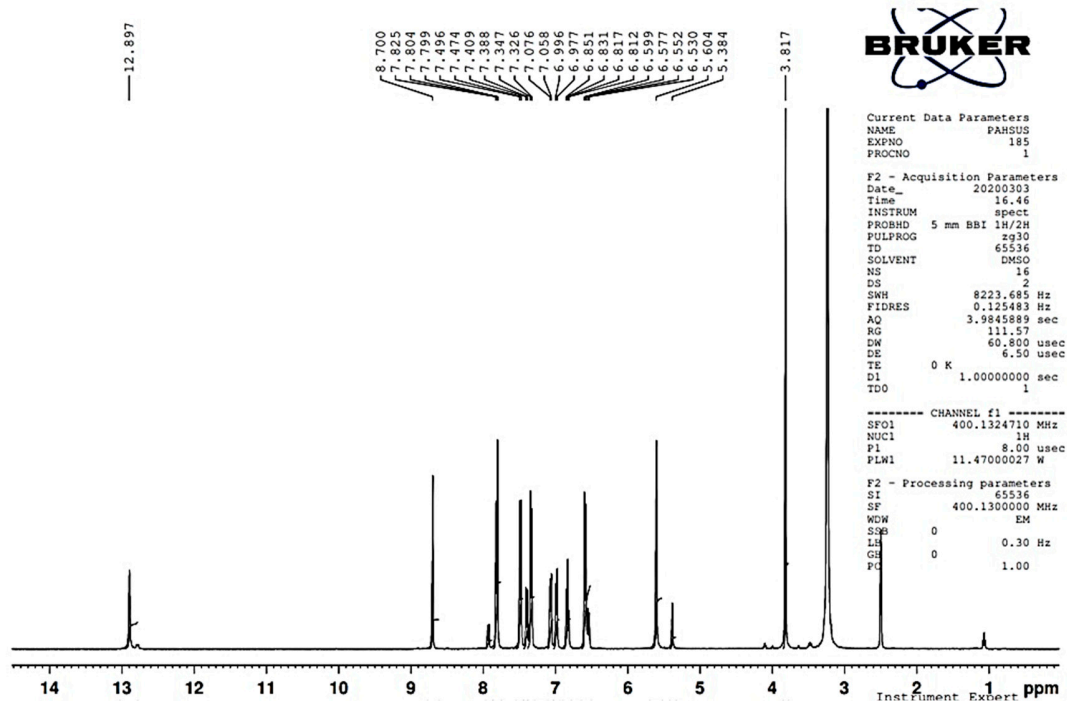

Figure S12:  $^1\text{H}$ -NMR spectrum of L4.

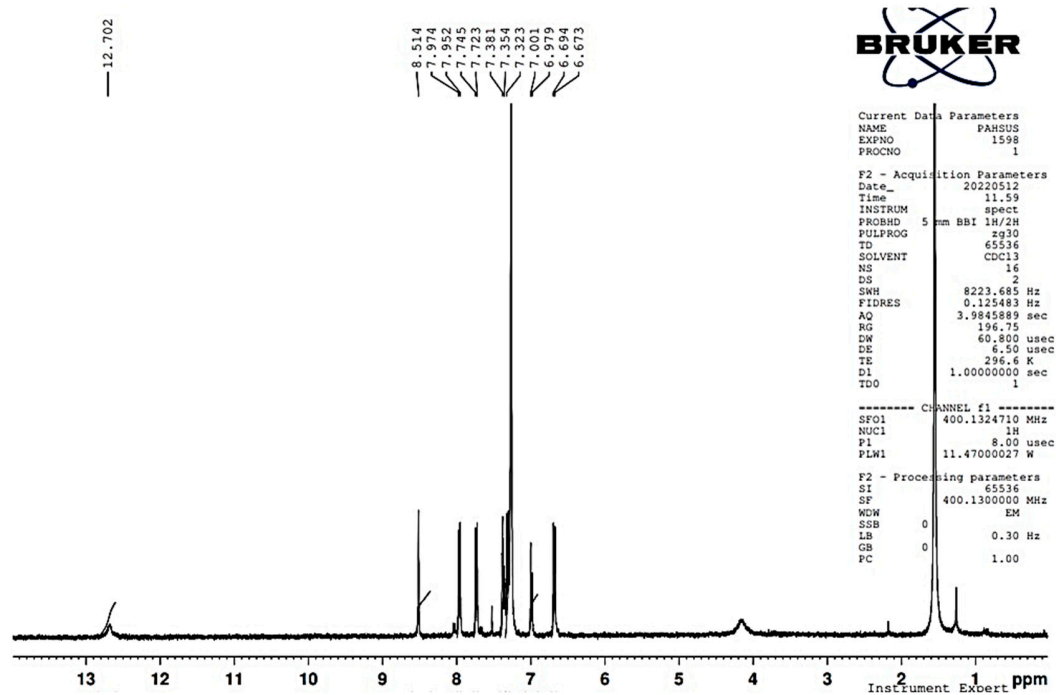

Figure S13:  $^1\text{H}$ NMR spectrum of  $\text{L}_5$ .

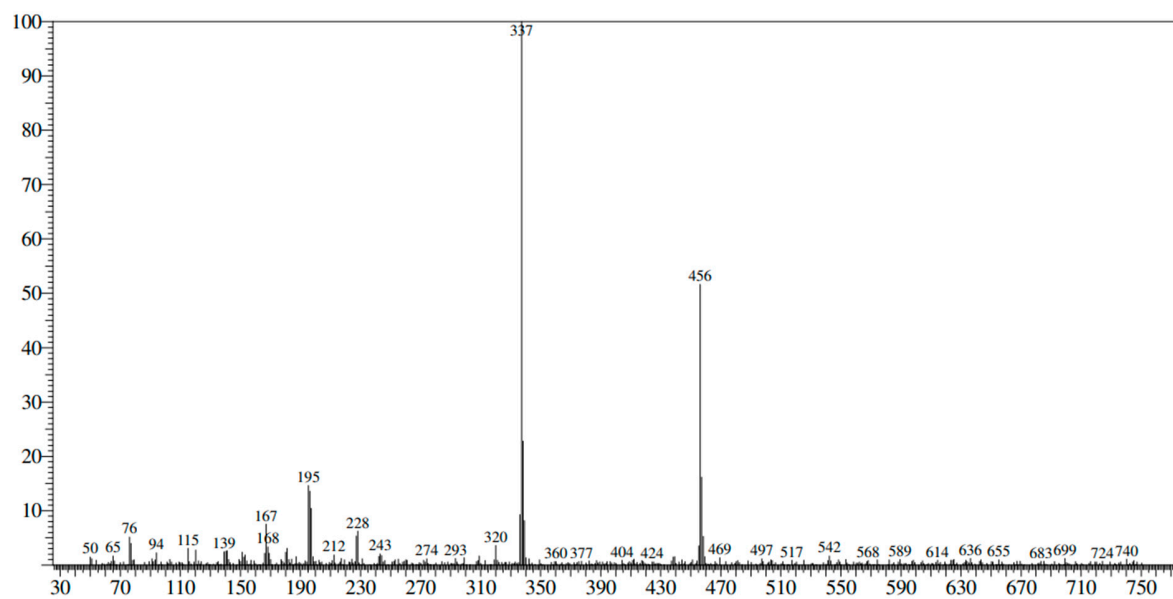

**Figure S14:** Mass spectrum of L<sub>1</sub>.



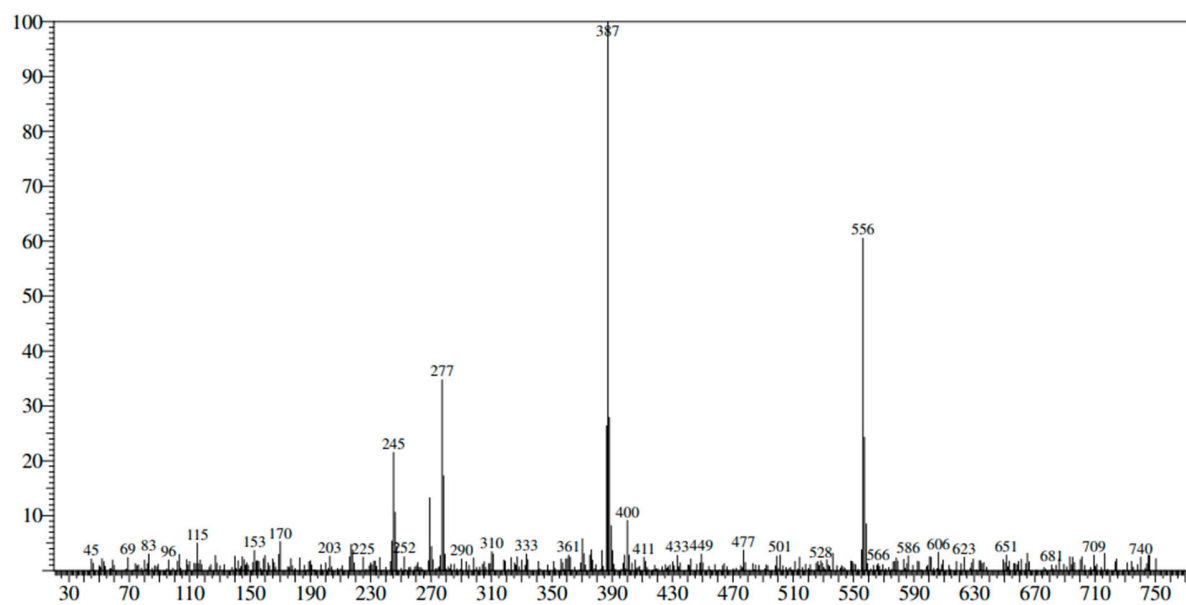

**Figure S15:** Mass spectrum of L2.

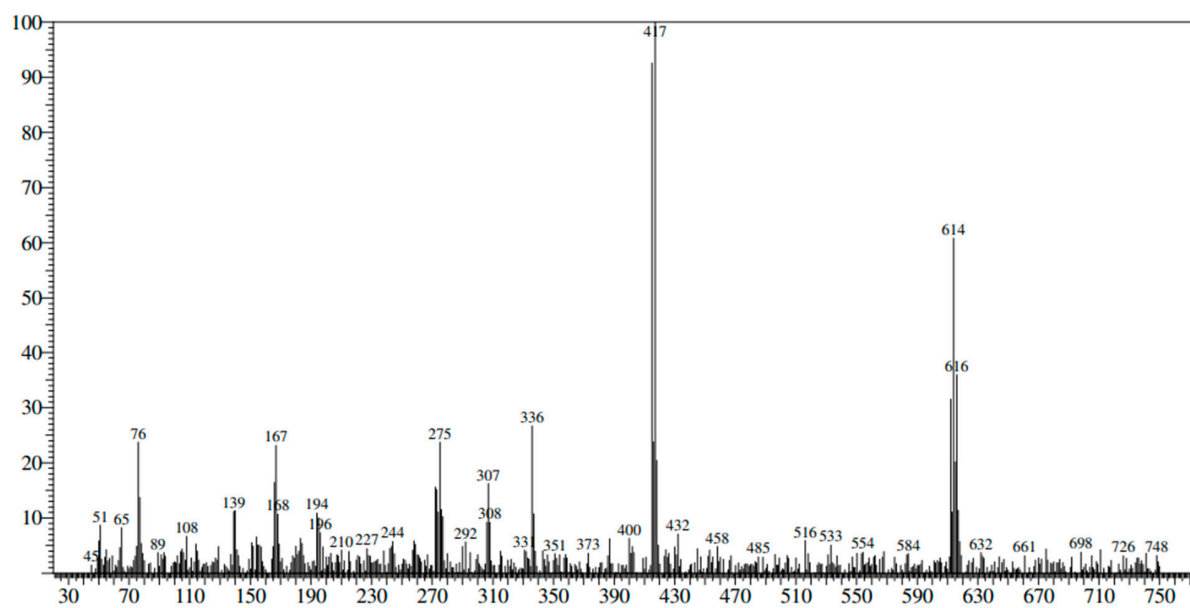

**Figure S16:** Mass spectrum of L<sub>3</sub>.

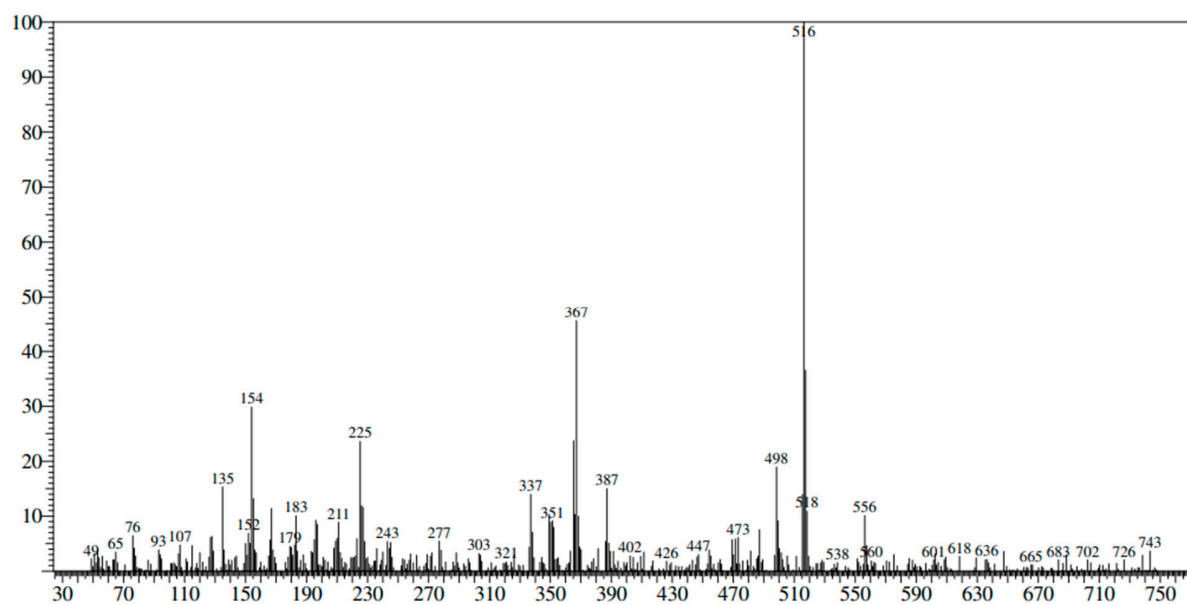

**Figure S17:** Mass spectrum of L4.

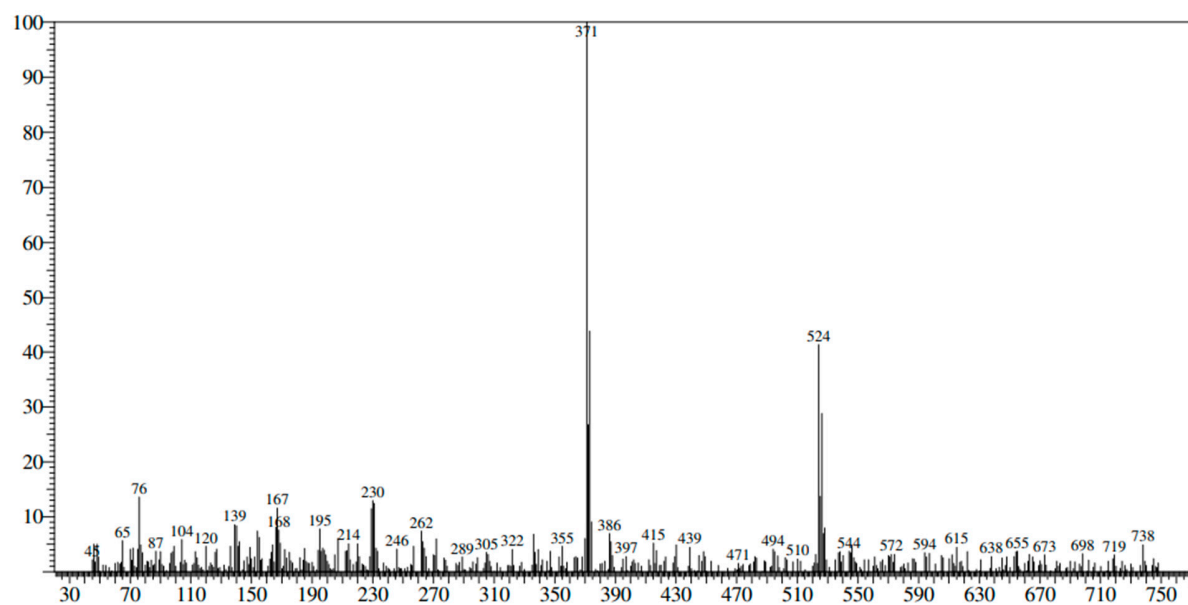

**Figure S18.** Mass spectrum of L5.

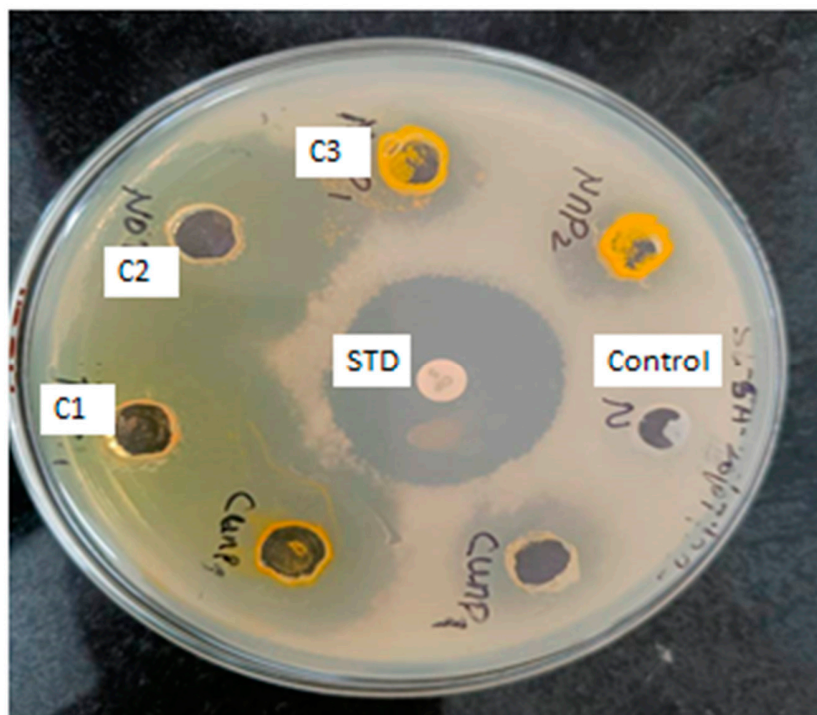

**Figure S19:** Antibacterial activity of Co(II) complexes and ligands against *Staphylococcus aureus*.

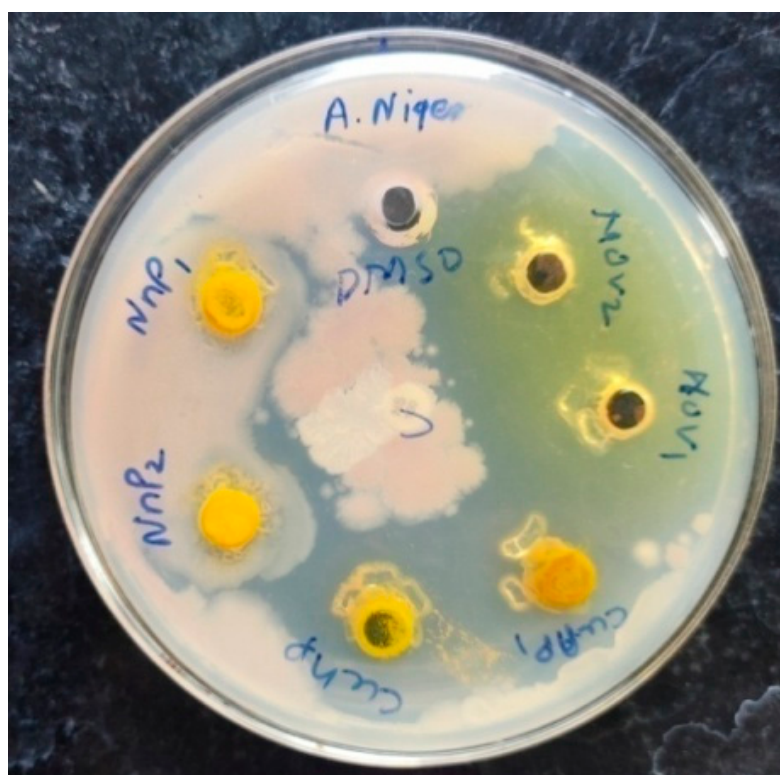

**Figure S20:** Antibacterial activity of Co(II) complexes and ligands against *Aspergillus niger*.

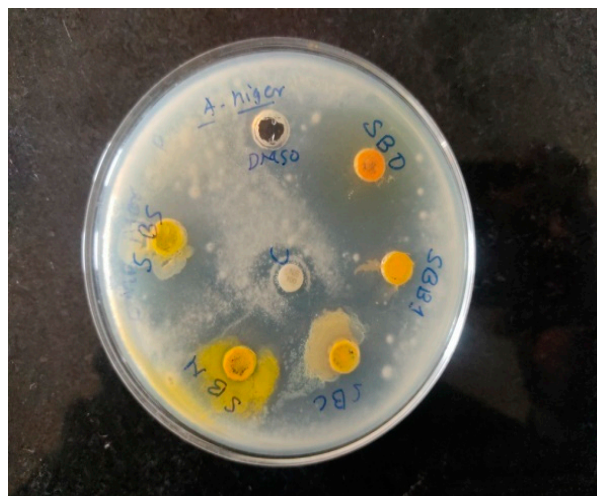

**Figure S21:** Ligand-Antibacterial activity against *Aspergillus niger*.

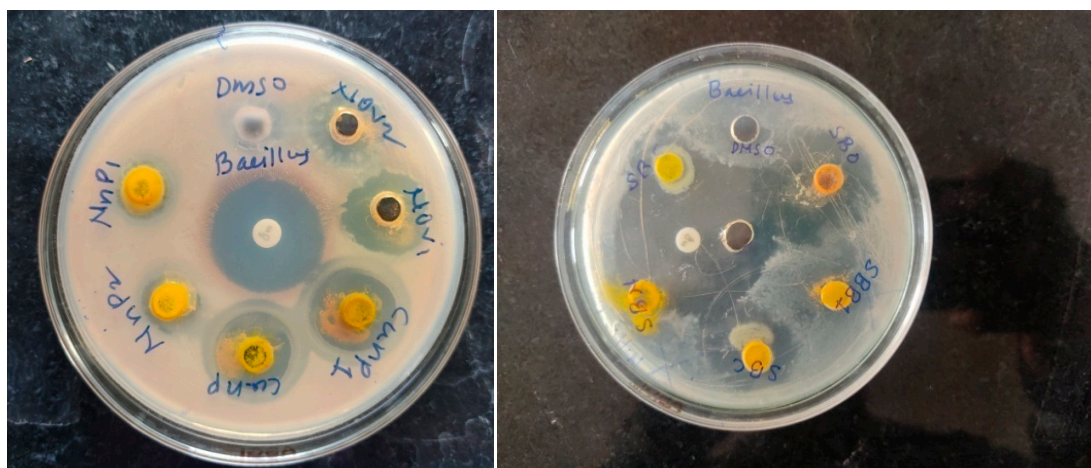

**Figure S22:** Antibacterial activity of Co(II) complexes and ligands against *Bacillus subtilis*.

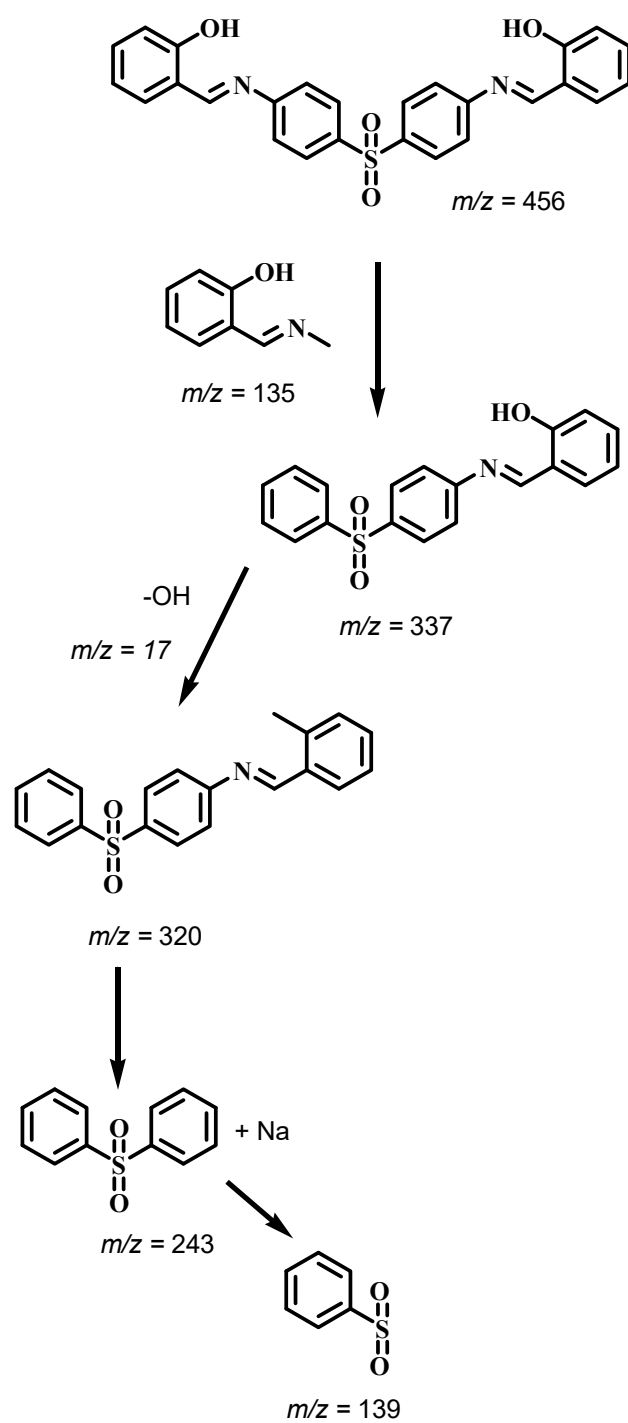

**Figure S23:** Mass fragmentation pattern of L1.

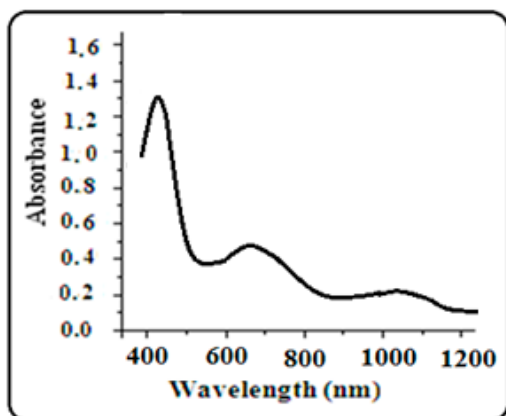

C1

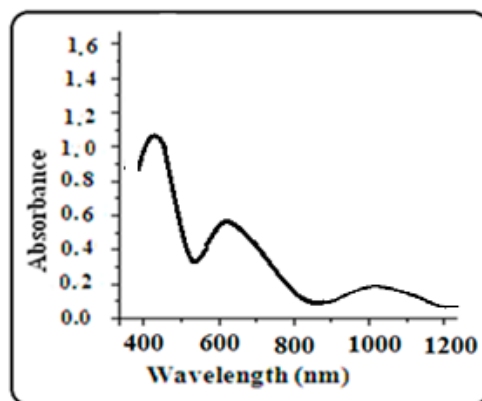

C3

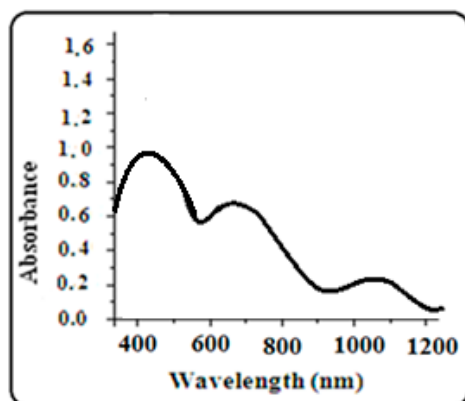

C5

**Figure S24:** UV-Visible absorption spectra of complexes.



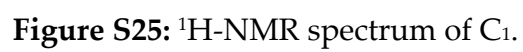

**Figure S25:**  $^1\text{H}$ -NMR spectrum of **C1**.

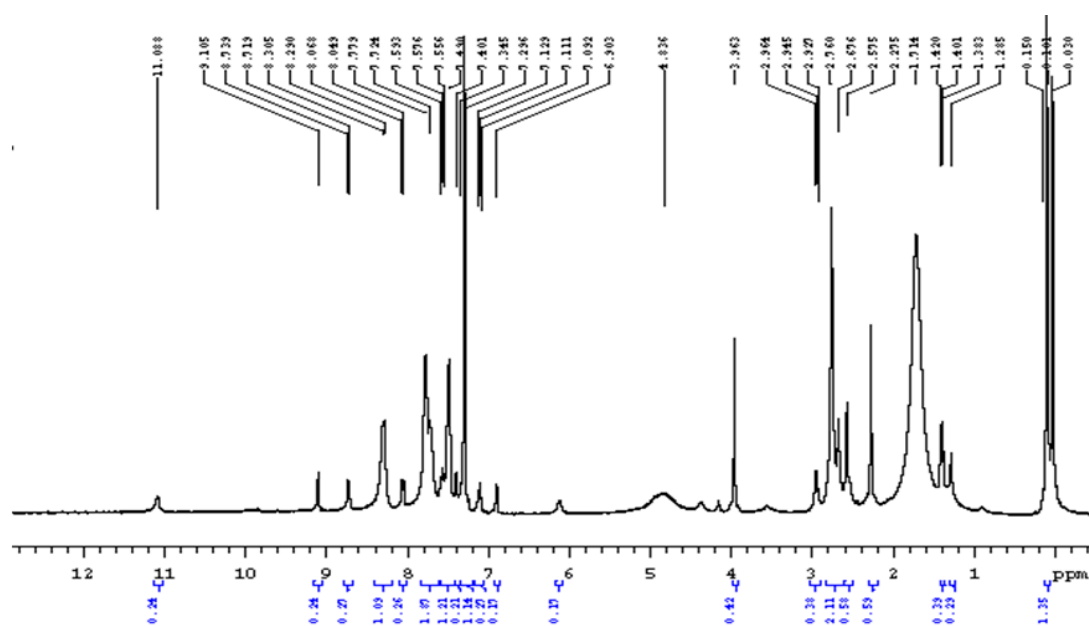

**Figure S26:**  $^1\text{H}$ -NMR spectrum of  $\text{C}_2$ .

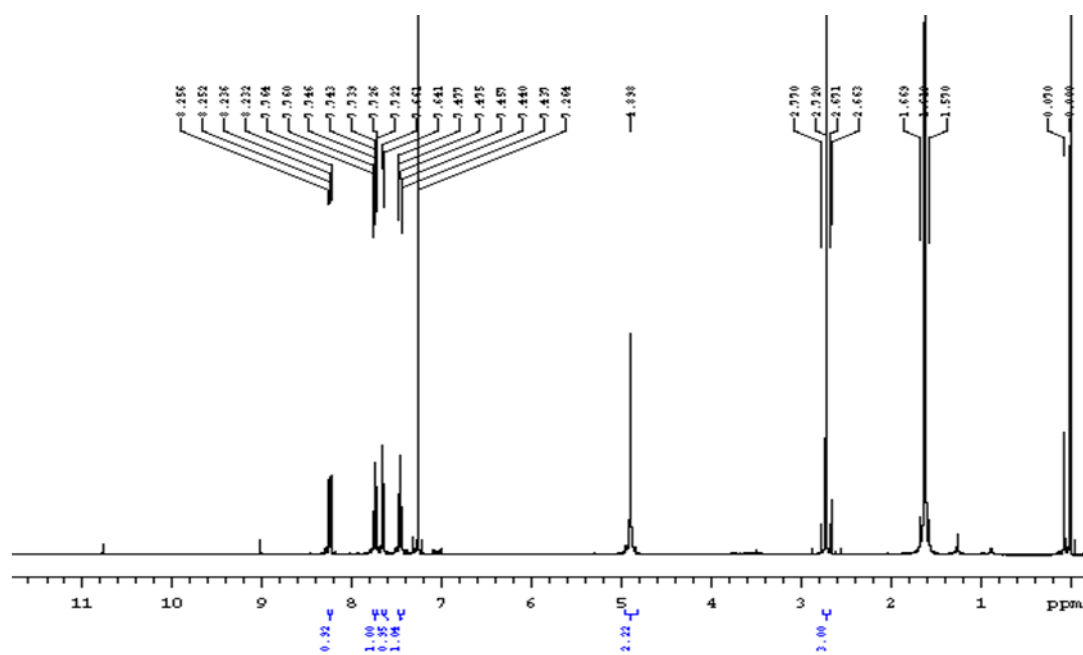

**Figure S27:**  $^1\text{H}$ -NMR spectrum of  $\text{C}_3$ .

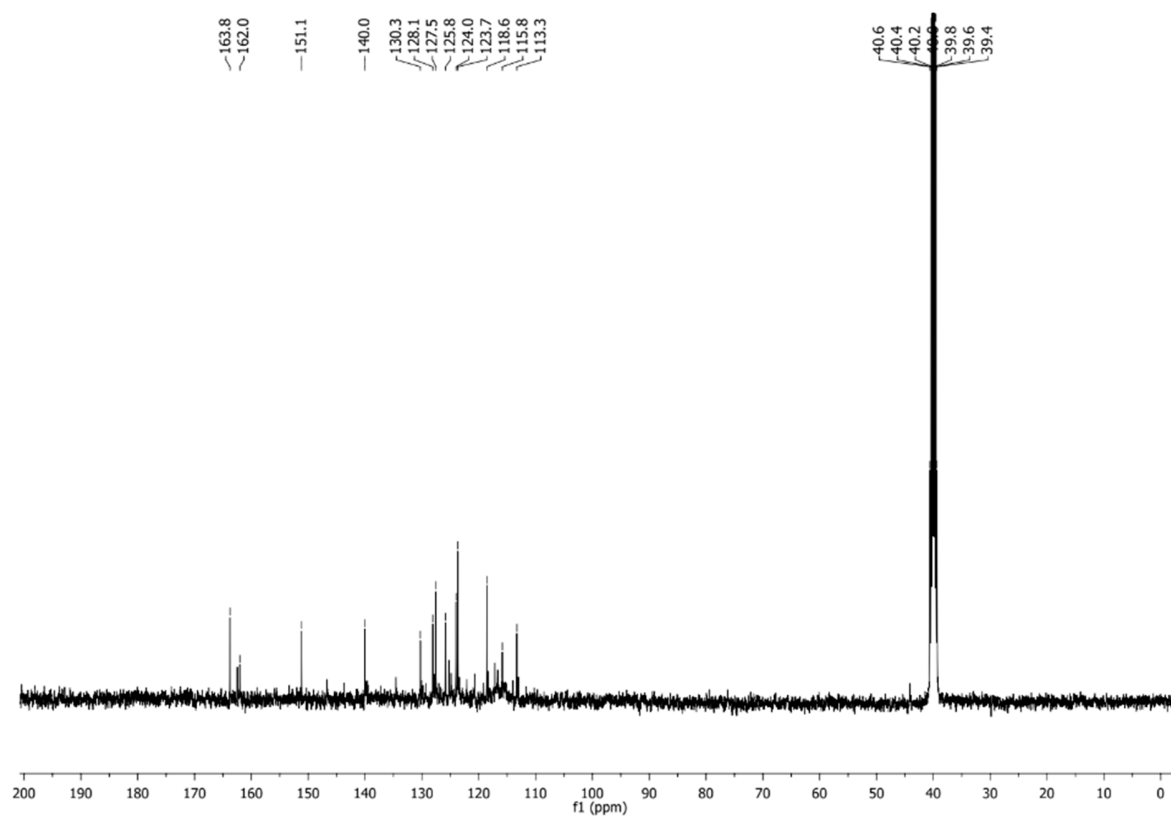

Figure S28:  $^{13}\text{C}$ -NMR spectrum of  $\text{C}_1$ .

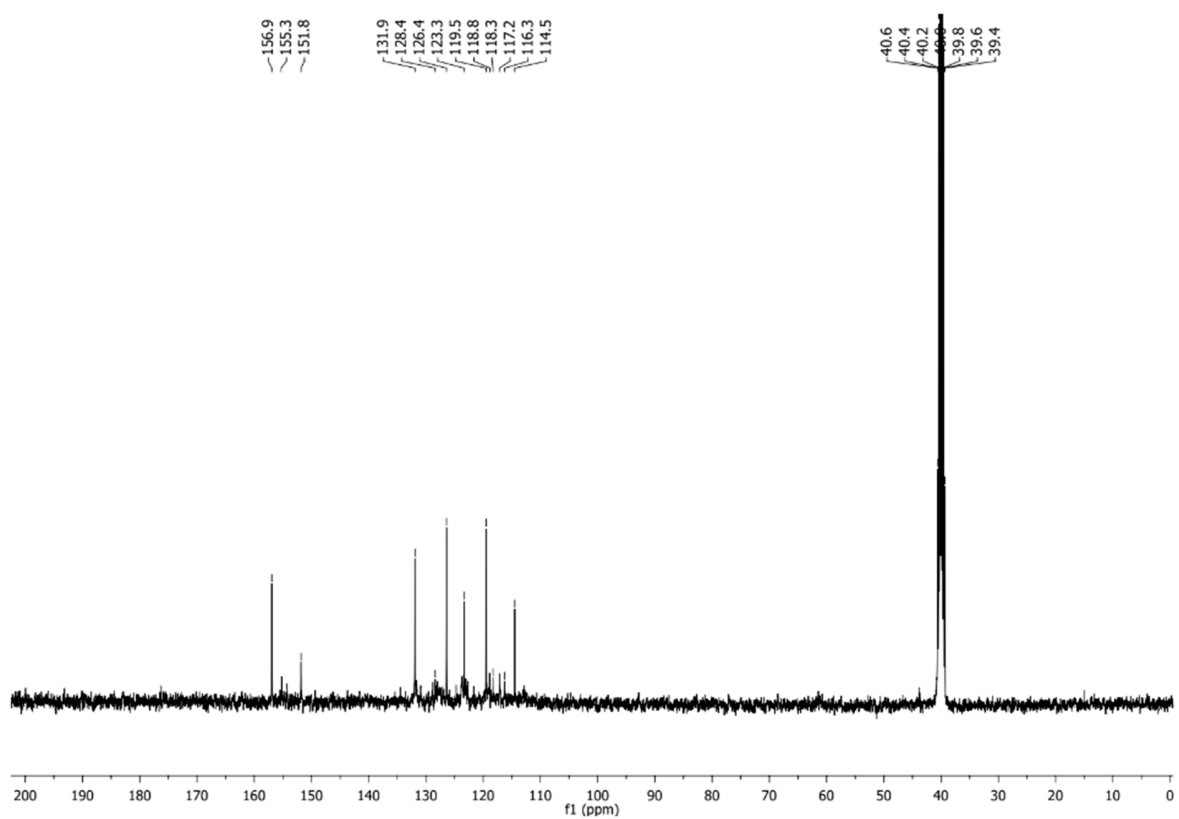

**Figure S29:**  $^{13}\text{C}$ -NMR spectrum of  $\text{C}_2$ .

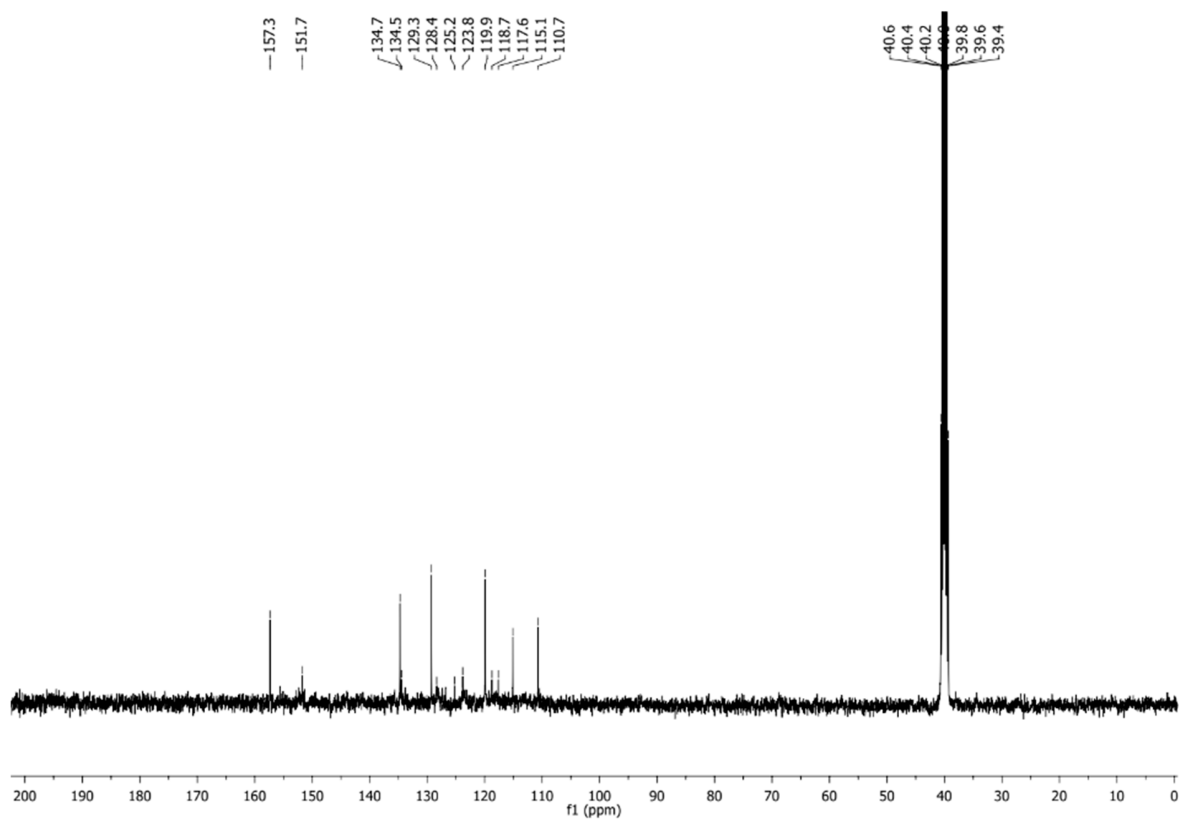

**Figure S30:**  $^{13}\text{C}$ -NMR spectrum of  $\text{C}_3$ .
